# Supplementary material for: Barriers and Enablers Affecting Successful Implementation of the Electronic Health Service Sisom: Multicenter Study of Child Participation in Pediatric Care
Source: PubMed Central journal article supplement (PMC6884717; doi:10.2196/14271), 2019-11-15
Supplement: jmir_v21i11e14271_app1.pdf [file jmir_v21i11e14271_app1.pdf]

Supplementary Table 1. Description of how Sisom was applied, at baseline and at follow up.

|                                                                        |                                                    | Baseline<br>(n=46) | Follow-up<br>(n=33) |
|------------------------------------------------------------------------|----------------------------------------------------|--------------------|---------------------|
| Type of appointment                                                    | Treatment                                          | 7 (15 %)           | 4 (12 %)            |
|                                                                        | New appointment                                    | 3 (6.5 %)          | 0 (0 %)             |
|                                                                        | Follow-up                                          | 24 (52.5 %)        | 24 (73 %)           |
|                                                                        | Sampling                                           | 6 (13 %)           | 0 (0 %)             |
|                                                                        | Other not specified                                | 5 (11 %)           | 4 (12 %)            |
|                                                                        | Missing                                            | 1 (2 %)            | 1 (3 %)             |
| Professionals participating at the appointment                         | Nurse/Counsellor                                   | 31 (67,5 %)        | 23 (69 %)           |
|                                                                        | 2-3 professionals*                                 | 14 (30,5 %)        | 9 (27 %)            |
|                                                                        | Missing                                            | 1 (2 %)            | 1 (3 %)             |
| Roles present when using Sisom                                         | Only the child                                     | 5 (11 %)           | 10 (30 %)           |
|                                                                        | Parents                                            | 14 (30 %)          | 7 (21 %)            |
|                                                                        | Professionals                                      | 19 (41 %)          | 10 (30 %)           |
|                                                                        | Parents & professionals                            | 7 (15 %)           | 4 (12 %)            |
|                                                                        | Missing                                            | 1 (2 %)            | 2 (6 %)             |
| Time used for the meeting                                              | <30 minutes                                        | 17 (37 %)          | 12 (36 %)           |
|                                                                        | 30-60 minutes                                      | 23 (50 %)          | 17 (51 %)           |
|                                                                        | >60 minutes                                        | 4 (9 %)            | 1 (3 %)             |
|                                                                        | Missing                                            | 2 (4 %)            | 3 (9 %)             |
| Sisom report used as the basis for the dialogue during the meeting     | Yes                                                | 29 (63 %)          | 27 (89 %)           |
|                                                                        | No                                                 | 16 (35 %)          | 5 (15 %)            |
|                                                                        | Missing                                            | 1 (2 %)            | 1 (3%)              |
| Choosing which parts in the report to talk about                       | The child initiated                                | 8 (17 %)           | 7 (21 %)            |
|                                                                        | The professional initiated                         | 15 (33 %)          | 13 (39 %)           |
|                                                                        | The parents initiated                              | 1 (2 %)            | 0 (0%)              |
|                                                                        | The child and the professional initiated together  | 9 (19 %)           | 6 (18 %)            |
|                                                                        | The professional and the parent initiated together | 0 (0 %)            | 1 (3 %)             |
|                                                                        | No dialogue was done                               | 1 (2 %)            | 1 (3 %)             |
|                                                                        | Missing                                            | 12 (26 %)          | 5 (15 %)            |
|                                                                        | Missing                                            | 12 (26 %)          | 5 (15 %)            |
| Action or decision taken based on the report and the following meeting | Yes                                                | 18 (39 %)          | 9 (27 %)            |
|                                                                        | No                                                 | 27 (59 %)          | 22 (67 %)           |
|                                                                        | Missing                                            | 1 (2 %)            | 2 (6 %)             |

\* nurse, doctor, counsellor or other
